# Supplementary material for: Surface hopping investigation of benzophenone excited state dynamics
Source: Royal Society of Chemistry journal article supplement (doi:10.1039/c6cp00328a), 2016-01-01
Supplement: c6cp00328a1.pdf [file c6cp00328a1.pdf]

Supporting informations

**Surface hopping investigation of benzophenone excited state dynamics.**

Lucilla Favero, Giovanni Granucci, Maurizio Persico  
University of Pisa

Table S1: Target values used in the reparameterization and semiempirical results obtained with the optimized parameters. Energies in eV, distances in Å, angles in degrees, frequencies in  $\text{cm}^{-1}$ . For the numbering of atoms see the main text.

|                                                     | target value | semiemp. value | weight |
|-----------------------------------------------------|--------------|----------------|--------|
| $S_0$ geom., $\Delta E(S_1 - S_0)$                  | 3.61         | 3.53           | 2.5    |
| $S_0$ geom., $\Delta E(S_2 - S_0)$                  | 4.40         | 4.56           | 2.2    |
| $S_0$ geom., $\Delta E(S_3 - S_0)$                  | 4.40         | 4.57           | 2.2    |
| $S_0$ geom., $\Delta E(S_4 - S_0)$                  | 5.01         | 4.76           | 2.5    |
| $S_0$ geom., $\Delta E(S_5 - S_0)$                  | 5.01         | 5.05           | 0.3    |
| $S_0$ geom., $\Delta E(T_2 - S_0)$                  | 3.61         | 3.51           | 1.3    |
| $S_0$ geom., $\Delta E(S_1 - T_1)$                  | 0.27         | 0.27           | 1.3    |
| $S_1$ geom., $\Delta E(S_1 - S_0)$                  | 2.95         | 2.93           | 1.0    |
| $S_1$ geom., $\Delta E(T_1 - S_0)$                  | 2.78         | 2.73           | 1.0    |
| $\Delta E(S_1 - S_0)$ , adiabatic                   | 3.25         | 3.30           | 1.2    |
| $\Delta E(T_1 - S_0)$ , adiabatic                   | 3.00         | 3.09           | 1.2    |
| $\Delta E(T_2 - T_1)$ , adiabatic                   | 0.25         | 0.25           | 0.2    |
| $S_0$ geom., R(CO)                                  | 1.23         | 1.23           | 1.2    |
| $S_0$ geom., R(CC <sub>1</sub> )                    | 1.49         | 1.45           | 3.8    |
| $S_0$ geom., angle OCC <sub>1</sub>                 | 119.2        | 119.5          | 0.7    |
| $S_0$ geom., dihed. OCC <sub>1</sub> C <sub>2</sub> | 147.0        | 150.4          | 0.6    |
| $S_0$ geom., freq. CO stretch                       | 1682         | 1738           | 1.0    |
| $S_1$ geom., R(CO)                                  | 1.32         | 1.33           | 0.7    |
| $S_1$ geom., R(CC <sub>1</sub> )                    | 1.45         | 1.41           | 2.7    |
| $S_1$ geom., angle OCC <sub>1</sub>                 | 128.1        | 113.7          | 0.5    |
| $S_1$ geom., dihed. OCC <sub>1</sub> C <sub>2</sub> | 156.6        | 159.2          | 0.5    |
| $T_1$ geom., R(CO)                                  | 1.33         | 1.31           | 0.5    |
| $T_1$ geom., R(CC <sub>1</sub> )                    | 1.44         | 1.42           | 2.7    |
| $T_1$ geom., angle OCC <sub>1</sub>                 | 115.5        | 114.5          | 0.4    |
| $T_1$ geom., dihed. OCC <sub>1</sub> C <sub>2</sub> | 153.6        | 156.9          | 0.5    |

Table S2: Optimized semiempirical parameters (AM1 Hamiltonian). The names of the parameters are those used in the MOPAC 2002 documentation [1]. Note that different parameters are used for carbonyl and phenyl C atoms.

|           | units              | C (phenyl)     | C (CO)         | O              | H              |
|-----------|--------------------|----------------|----------------|----------------|----------------|
| $U_{ss}$  | eV                 | -49.6687239029 | -51.5926064181 | -89.0096523334 | -10.8491535539 |
| $U_{pp}$  | eV                 | -39.4813823220 | -39.1437309074 | -77.8379181410 |                |
| $\beta_s$ | eV                 | -16.1116257628 | -15.2814454696 | -26.5060604145 | -6.3376982810  |
| $\beta_p$ | eV                 | -8.3845965271  | -7.2293910728  | -28.7179596479 |                |
| $\zeta_s$ | bohr <sup>-1</sup> | 1.6569306913   | 1.9117163234   | 3.2500086920   | 1.2530447780   |
| $\zeta_p$ | bohr <sup>-1</sup> | 1.6551097550   | 1.5066165958   | 2.5701260986   |                |
| $\alpha$  | Å <sup>-1</sup>    | 2.7268920403   | 2.6970289946   | 4.8641229413   | 3.0516601405   |
| $g_{ss}$  | eV                 | 12.2719459805  | 11.7417627149  | 5.7214695341   | 12.7862091987  |
| $g_{sp}$  | eV                 | 11.9324870503  | 11.6321710371  | 14.7170663247  |                |
| $g_{pp}$  | eV                 | 11.3601849803  | 11.5241312615  | 14.1552702814  |                |
| $g_{p2}$  | eV                 | 10.1373025627  | 10.0097524401  | 12.5185353113  |                |
| $h_{sp}$  | eV                 | 2.5377929671   | 2.4791208390   | 4.1404905520   |                |
| $K_1$     |                    | 0.0116442026   | 0.0113409756   | 0.2805746085   | 0.1228093162   |
| $K_2$     |                    | 0.0459575575   | 0.0459132653   | 0.0814799447   | 0.0050787568   |
| $K_3$     |                    | -0.0200528574  | -0.0201275231  |                | -0.0183256794  |
| $K_4$     |                    | -0.0012600880  | -0.0012597132  |                |                |
| $L_1$     | Å <sup>-1</sup>    | 5.0367158876   | 4.9870025958   | 5.0018065393   | 4.9997012140   |
| $L_2$     | Å <sup>-1</sup>    | 5.0074531553   | 5.0003839163   | 7.0018495184   | 5.0013957709   |
| $L_3$     | Å <sup>-1</sup>    | 4.9996150387   | 4.9914903143   |                | 2.0001017670   |
| $L_4$     | Å <sup>-1</sup>    | 5.0346091244   | 5.0224265554   |                |                |
| $M_1$     | Å                  | 1.6017218027   | 1.6010185123   | 0.8482873880   | 1.2000291535   |
| $M_2$     | Å                  | 1.8499416727   | 1.8512004187   | 1.4205195400   | 1.7917419639   |
| $M_3$     | Å                  | 2.0513647895   | 2.0501383394   |                | 2.1018835858   |
| $M_4$     | Å                  | 2.6473006889   | 2.6501071193   |                |                |

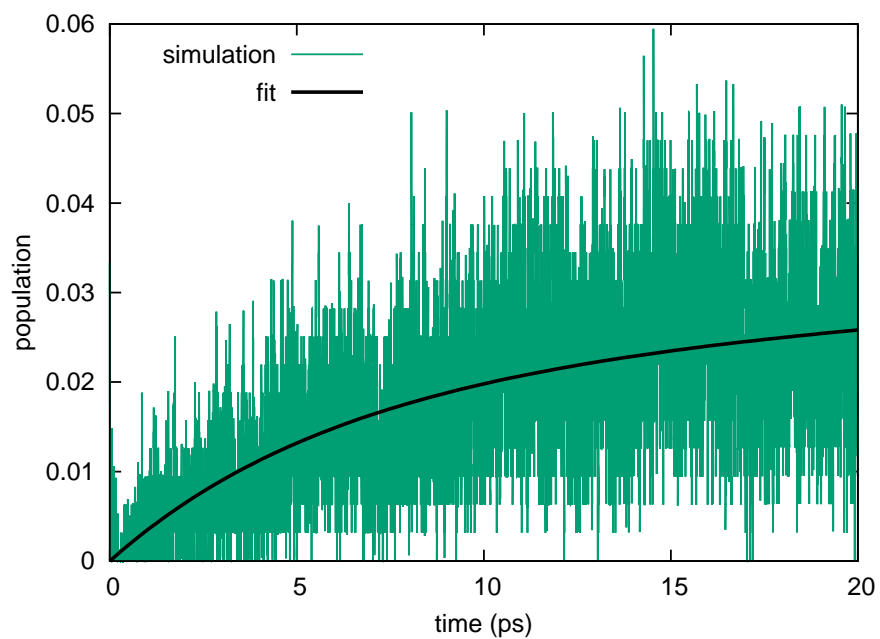

Figure S1:  $T_3$  population. Green curve, simulation; black curve, fit with biexponential decay of  $S_1$ .

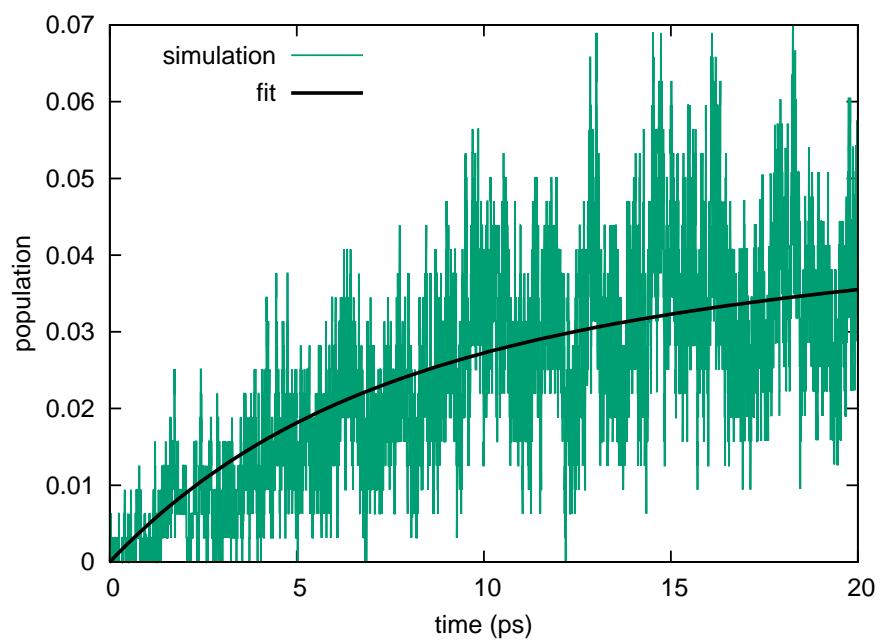

Figure S2: Sum of the populations of  $T_4$  and higher triplets. Green curve, simulation; black curve, fit with biexponential decay of  $S_1$ .

Table S3: Radiationless transition rates  $\overline{R}_{KL}$  ( $\text{ps}^{-1}$ ) and rate constants  $\overline{T}_{KL}$  between spin-diabatic states (or groups of states), averaged over time intervals  $[t_1, t_2]$ . Some of the rate constants cannot be reliably determined, because in the given time interval very few hops took place, starting from a state with a small population.

| state $K$ | state(s) $L$   | $t_1, t_2$ | $\overline{R}_{K \rightarrow L}$ | $\overline{R}_{L \rightarrow K}$ | $\Delta \overline{R}_{K \rightarrow L}$ | $\overline{T}_{K \rightarrow L}$ | $\overline{T}_{L \rightarrow K}$ |
|-----------|----------------|------------|----------------------------------|----------------------------------|-----------------------------------------|----------------------------------|----------------------------------|
| $S_1$     | $T_1$          | 0, 5       | 0.038                            | 0.005                            | 0.033                                   | 0.045                            | 0.051                            |
| $S_1$     | $T_1$          | 5,10       | 0.036                            | 0.007                            | 0.029                                   | 0.061                            | 0.022                            |
| $S_1$     | $T_1$          | 10,15      | 0.027                            | 0.012                            | 0.015                                   | 0.058                            | 0.029                            |
| $S_1$     | $T_1$          | 15,20      | 0.015                            | 0.014                            | 0.001                                   | 0.038                            | 0.030                            |
| $S_1$     | $T_1$          | 0,20       | 0.029                            | 0.009                            | 0.019                                   | 0.051                            | 0.033                            |
| $S_1$     | $T_2$          | 0, 5       | 0.103                            | 0.085                            | 0.019                                   | 0.125                            | 1.376                            |
| $S_1$     | $T_2$          | 5,10       | 0.080                            | 0.077                            | 0.003                                   | 0.136                            | 1.421                            |
| $S_1$     | $T_2$          | 10,15      | 0.075                            | 0.073                            | 0.002                                   | 0.163                            | 1.034                            |
| $S_1$     | $T_2$          | 15,20      | 0.068                            | 0.065                            | 0.003                                   | 0.173                            | 0.816                            |
| $S_1$     | $T_2$          | 0,20       | 0.082                            | 0.075                            | 0.007                                   | 0.149                            | 1.162                            |
| $S_1$     | $T_3$          | 0, 5       | 0.004                            | 0.006                            | -0.002                                  | 0.005                            | —                                |
| $S_1$     | $T_3$          | 5,10       | 0.004                            | 0.004                            | -0.001                                  | 0.007                            | —                                |
| $S_1$     | $T_3$          | 10,15      | 0.006                            | 0.007                            | -0.001                                  | 0.014                            | 0.307                            |
| $S_1$     | $T_3$          | 15,20      | 0.007                            | 0.006                            | 0.001                                   | 0.018                            | 0.227                            |
| $S_1$     | $T_3$          | 0,20       | 0.005                            | 0.006                            | 0.000                                   | 0.011                            | 0.133                            |
| $S_1$     | $T_4 - T_{10}$ | 0, 5       | 0.008                            | 0.003                            | 0.005                                   | 0.009                            | —                                |
| $S_1$     | $T_4 - T_{10}$ | 5,10       | 0.010                            | 0.003                            | 0.007                                   | 0.017                            | —                                |
| $S_1$     | $T_4 - T_{10}$ | 10,15      | 0.004                            | 0.004                            | 0.000                                   | 0.008                            | —                                |
| $S_1$     | $T_4 - T_{10}$ | 15,20      | 0.008                            | 0.006                            | 0.002                                   | 0.019                            | —                                |
| $S_1$     | $T_4 - T_{10}$ | 0,20       | 0.007                            | 0.004                            | 0.003                                   | 0.013                            | —                                |

Table S3 continued.

| state $K$ | state(s) $L$   | $t_1, t_2$ | $\overline{R}_{K \rightarrow L}$ | $\overline{R}_{L \rightarrow K}$ | $\Delta \overline{R}_{K \rightarrow L}$ | $\overline{T}_{K \rightarrow L}$ | $\overline{T}_{L \rightarrow K}$ |
|-----------|----------------|------------|----------------------------------|----------------------------------|-----------------------------------------|----------------------------------|----------------------------------|
| $T_1$     | $T_2$          | 0, 5       | 1.066                            | 1.008                            | 0.059                                   | 7.555                            | 25.4                             |
| $T_1$     | $T_2$          | 5,10       | 2.567                            | 2.438                            | 0.129                                   | 8.165                            | 44.6                             |
| $T_1$     | $T_2$          | 10,15      | 3.453                            | 3.271                            | 0.182                                   | 8.475                            | 46.1                             |
| $T_1$     | $T_2$          | 15,20      | 3.832                            | 3.599                            | 0.233                                   | 8.300                            | 44.8                             |
| $T_1$     | $T_2$          | 0,20       | 2.730                            | 2.579                            | 0.151                                   | 8.124                            | 40.2                             |
| $T_1$     | $T_3$          | 0, 5       | 0.225                            | 0.260                            | -0.034                                  | 1.443                            | —                                |
| $T_1$     | $T_3$          | 5,10       | 0.581                            | 0.605                            | -0.024                                  | 1.859                            | —                                |
| $T_1$     | $T_3$          | 10,15      | 0.810                            | 0.853                            | -0.043                                  | 1.985                            | 37.2                             |
| $T_1$     | $T_3$          | 15,20      | 0.866                            | 0.937                            | -0.071                                  | 1.876                            | 38.0                             |
| $T_1$     | $T_3$          | 0,20       | 0.621                            | 0.664                            | -0.043                                  | 1.791                            | 18.8                             |
| $T_1$     | $T_4 - T_{10}$ | 0, 5       | 0.162                            | 0.201                            | -0.039                                  | 1.059                            | —                                |
| $T_1$     | $T_4 - T_{10}$ | 5,10       | 0.376                            | 0.480                            | -0.103                                  | 1.183                            | —                                |
| $T_1$     | $T_4 - T_{10}$ | 10,15      | 0.535                            | 0.670                            | -0.135                                  | 1.313                            | —                                |
| $T_1$     | $T_4 - T_{10}$ | 15,20      | 0.540                            | 0.704                            | -0.164                                  | 1.172                            | —                                |
| $T_1$     | $T_4 - T_{10}$ | 0,20       | 0.403                            | 0.514                            | -0.111                                  | 1.182                            | —                                |
| $T_2$     | $T_3$          | 0, 5       | 0.191                            | 0.157                            | 0.033                                   | 4.997                            | —                                |
| $T_2$     | $T_3$          | 5,10       | 0.445                            | 0.401                            | 0.043                                   | 8.185                            | —                                |
| $T_2$     | $T_3$          | 10,15      | 0.634                            | 0.569                            | 0.065                                   | 8.934                            | 24.8                             |
| $T_2$     | $T_3$          | 15,20      | 0.691                            | 0.590                            | 0.101                                   | 8.604                            | 23.9                             |
| $T_2$     | $T_3$          | 0,20       | 0.490                            | 0.429                            | 0.061                                   | 7.680                            | 12.2                             |
| $T_2$     | $T_4 - T_{10}$ | 0, 5       | 0.087                            | 0.046                            | 0.040                                   | 2.004                            | —                                |
| $T_2$     | $T_4 - T_{10}$ | 5,10       | 0.208                            | 0.128                            | 0.080                                   | 3.735                            | —                                |
| $T_2$     | $T_4 - T_{10}$ | 10,15      | 0.318                            | 0.195                            | 0.123                                   | 4.475                            | —                                |
| $T_2$     | $T_4 - T_{10}$ | 15,20      | 0.326                            | 0.196                            | 0.130                                   | 4.057                            | —                                |
| $T_2$     | $T_4 - T_{10}$ | 0,20       | 0.235                            | 0.141                            | 0.093                                   | 3.568                            | —                                |
| $T_3$     | $T_4 - T_{10}$ | 0, 5       | 0.060                            | 0.063                            | -0.003                                  | —                                | —                                |
| $T_3$     | $T_4 - T_{10}$ | 5,10       | 0.169                            | 0.151                            | 0.018                                   | —                                | —                                |
| $T_3$     | $T_4 - T_{10}$ | 10,15      | 0.266                            | 0.247                            | 0.019                                   | 11.7                             | —                                |
| $T_3$     | $T_4 - T_{10}$ | 15,20      | 0.250                            | 0.218                            | 0.032                                   | 10.1                             | —                                |
| $T_3$     | $T_4 - T_{10}$ | 0,20       | 0.186                            | 0.170                            | 0.016                                   | 5.45                             | —                                |

## References

- [1] J. J. P Stewart, *MOPAC 2002*, Fujitsu Limited, Tokio, Japan.
